# Supplementary material for: Risk of Post-Myocardial Infarction Pneumonia with Proton Pump Inhibitors, H2 Receptor Antagonists and Mucoprotective Agents: A Retrospective Nationwide Cohort Study
Source: MDPI journal article supplement (doi:10.3390/jpm12010078), 2022-01-09
Supplement: s1 [file s1]

**Table S1.** Effect of proton pump inhibitor and H2-receptor antagonist on the risk for post-myocardial infarction pneumonia according to dose intensity

| Medication                | Dose intensity | Adjusted HR<br>[95% CI] | P value | P value for<br>trend |
|---------------------------|----------------|-------------------------|---------|----------------------|
| Proton pump<br>inhibitor  | no use         | Ref                     |         |                      |
|                           | low dose       | 2.61 [1.69-4.05]        | <0.001  | <.001                |
|                           | high dose      | 1.75 [0.96-3.18]        | 0.069   |                      |
| H2-receptor<br>antagonist | no use         | Ref                     |         |                      |
|                           | low dose       | 1.44 [1.05-1.96]        | 0.023   | 0.007                |
|                           | high dose      | 1.63 [1.08-2.45]        | 0.019   |                      |

Data are derived by multivariate time-dependent Cox proportional hazard regression model adjusted for sex, age, household income, length of hospital stay, the presence of hypertension, diabetes mellitus, heart failure, stroke, and chronic obstructive pulmonary disease, prior history of gastrointestinal bleeding, and treatment with antiplatelet, anticoagulant within 30 days after myocardial infarction admission. Abbreviations: HR, hazard ratio; CI, confidence interval.
